# Supplementary material for: Integration of Bulk RNA-seq Pipeline Metrics for Assessing Low-Quality Samples
Source: Research Square preprint supplement (doi:10.21203/rs.3.rs-6976695/v1), 2025-07-03
Supplement: Supplementary file 1 [file 50884a8c1698d2d34273eda3.xlsx]

## Sheet: Sheet1
Cutoff	# Sequencing Depth	% Post-Trim Reads	% Uniquely Aligned Reads	% Reads Mapped to Exons	% rRNA Reads	% Overrep Sequences (Post-Trim)	% Adapter Content (Post-Trim)	# Detected Genes	Gene Body Coverage
Warn	1.72707e+07	95.5905	33.2458	51.2536	0.272887	1.07297	0.290163	11575.7	0.181664
Fail	1.62801e+07	94.018	25.3928	47.2897	0.315549	1.31128	0.38616	10510.3	0.216656
