# Supplementary material for: Integration of Bulk RNA-seq Pipeline Metrics for Assessing Low-Quality Samples
Source: Research Square preprint supplement (doi:10.21203/rs.3.rs-6976695/v1), 2025-07-03
Supplement: Supplementary file 2 [file 77867a843c71b683f07da881.xlsx]

## Sheet: Sheet1
Marker Gene	Supporting Citations	Cell Type
KRT7	(Moll, Divo, and Langbein 2008)	Epithelial
KRT5	(Moll, Divo, and Langbein 2008; Reyfman et al., 2019)	Epithelial
EPCAM	(Trzpis et al., 2007; Osta et. al., 2004)	Epithelial
SLPI	(Abe et al., 1991)	Secretory Epithelial
SCGB3A1	(Reyfman et al., 2019)	Secretory Epithelial
FOXJ1	(Yu et al., 2008)	Ciliated Epithelial
TPPP3	(Ivliev et al., 2012)	Ciliated Epithelial
DCN	(Reyfman et al., 2019)	Fibroblast
VWF	(Reyfman et al., 2019)	Endothelial
CD3D	(Wegener et al., 1992)	T-Cell
CD3E	(Wegener et al., 1992)	T-Cell
CD3G	(Wegener et al.,I’ 1992)	T-Cell
CTLA4	(Rowshanravan, Halliday, and Sansom 2018)	T-Cell
IL32	(Joosten et al. 2006)	T-cell
CD2	(Binder et al. 2020)	T-cell /NK Cell
IGHG4	(Reyfman et al. 2019)	B Cell / Plasma Cell
IGHM	(H. W. Schroeder Jr and Cavacini 2010)	B Cell
IGHG2	(de Jong et al. 2017)	B Cell / Plasma Cell
MS4A1	(Ernst et al. 2005)	B Cell
S100A4	(W. Zhang et al. 2018)	Macrophage
CD68	(Holness and Simmons 1993 ; Reyfman et al. 2019)	Macrophage
MARCO	(Reyfman et al. 2019)	Macrophage
FCER1G	(Dang et al. 2020)	Macrophage
TYROBP	(Dang et al. 2020)	Macrophage
PPARG	(Reyfman et al. 2019)	Macrophage
