# Supplementary material for: Integration of Bulk RNA-seq Pipeline Metrics for Assessing Low-Quality Samples
Source: Research Square preprint supplement (doi:10.21203/rs.3.rs-6976695/v1), 2025-07-03
Supplement: Supplementary file 3 [file 96d3678224d38be89f00c9bd.xlsx]

## Sheet: Sheet 1
Bins	RNA_B01_01	RNA_B01_02	RNA_B01_03	RNA_B01_04	RNA_B01_05	RNA_B01_06	RNA_B01_07	RNA_B01_08	RNA_B01_09	RNA_B01_10	RNA_B01_11	RNA_B01_12	RNA_B01_13	RNA_B01_14	RNA_B01_15	RNA_B01_16	RNA_B01_17	RNA_B01_18	RNA_B01_19	RNA_B01_20	RNA_B01_21	RNA_B01_22	RNA_B01_23	RNA_B01_24	RNA_B02_01	RNA_B02_02	RNA_B02_03	RNA_B02_04	RNA_B02_05	RNA_B02_06	RNA_B02_07	RNA_B02_08	RNA_B02_09	RNA_B02_10	RNA_B02_11	RNA_B02_12	RNA_B02_13	RNA_B02_14	RNA_B02_15	RNA_B02_16	RNA_B02_17	RNA_B02_18	RNA_B02_19	RNA_B02_20	RNA_B02_21	RNA_B02_22	RNA_B02_23	RNA_B02_24	RNA_B03_01
(0,0.25]	0	0	0	0	0	994	0	0	342	0	558	437	0	0	778	0	338	609	589	893	976	494	3779	1668	482	0	0	0	0	0	0	0	443	0	916	789	1220	1114	0	1010	566	0	0	991	793	1127	715	1466	627
(0.25,0.5]	0	931	1232	0	1362	657	0	734	108	869	783	252	432	0	1014	604	243	351	615	727	1042	436	1664	2106	236	1645	0	1836	425	1921	1374	1487	246	1180	564	939	731	1183	2897	564	555	774	1906	577	757	1122	682	1872	719
(0.5,0.75]	0	0	679	533	0	771	0	0	126	1123	671	466	67	633	417	148	192	494	428	330	653	312	1441	1326	347	1109	2133	0	256	0	0	885	426	376	737	599	908	666	669	691	398	0	526	808	513	725	471	1358	493
(0.75,1]	0	551	512	0	768	915	0	441	91	383	665	229	109	516	957	305	175	161	311	416	745	238	1089	1041	428	1383	1102	1016	89	1010	883	583	475	317	298	642	317	503	1012	465	425	449	476	598	521	594	516	1035	557
(1,1.25]	2324	815	391	341	551	456	2367	328	168	659	471	558	152	454	626	180	254	416	396	404	584	312	650	1155	257	514	0	767	211	728	617	520	239	446	639	511	764	594	708	556	378	316	657	494	420	719	417	1268	490
(1.25,1.5]	0	255	698	284	431	519	0	535	125	525	501	298	157	437	489	439	342	233	386	319	605	273	626	1085	318	753	815	559	181	593	904	383	409	548	340	575	395	431	570	433	302	264	549	617	489	653	455	962	525
(1.5,1.75]	1215	277	578	257	743	564	1184	194	288	657	518	510	274	343	531	253	281	378	318	403	601	248	479	835	402	568	604	463	159	798	372	614	361	273	436	540	655	498	596	367	421	461	654	675	558	532	458	958	449
(1.75,2]	0	450	447	230	269	542	0	345	290	457	445	326	271	559	413	388	302	252	385	371	443	335	547	764	409	677	916	734	217	345	608	491	317	369	483	443	391	508	487	509	369	205	524	529	408	501	427	871	467
(2,2.25]	803	577	427	196	501	519	908	316	335	411	451	430	335	473	551	244	289	389	365	431	466	334	426	677	395	543	354	559	200	778	536	423	404	418	511	439	522	461	499	419	373	366	547	517	544	499	423	610	572
(2.25,2.5]	0	329	556	398	433	480	707	382	281	549	465	379	321	394	390	365	329	343	427	418	529	301	425	673	418	570	618	483	259	368	419	520	382	476	402	475	422	411	392	452	396	349	396	545	454	459	459	753	481
(2.5,2.75]	662	417	647	300	520	430	522	337	314	487	420	490	277	349	465	312	362	419	372	418	461	352	480	601	473	458	482	389	318	496	543	457	406	420	436	456	501	437	508	419	435	446	471	472	470	509	416	645	512
(2.75,3]	499	475	619	293	423	413	436	397	285	419	469	419	381	431	442	455	369	382	444	402	491	434	475	629	421	449	623	615	304	434	570	496	445	447	451	457	442	458	423	466	417	536	590	485	439	459	454	636	530
(3,3.25]	838	451	530	402	516	487	714	366	333	455	437	470	314	509	484	364	425	466	443	457	488	432	446	592	461	440	544	439	329	464	516	455	498	550	431	487	438	454	467	469	416	334	467	554	453	461	455	611	480
(3.25,3.5]	329	513	542	334	567	506	627	408	398	526	486	478	421	451	491	427	410	364	486	445	465	536	513	601	365	515	533	572	319	557	551	470	471	509	491	492	489	492	492	497	507	581	507	505	487	478	447	620	489
(3.5,3.75]	623	452	481	385	441	492	531	516	392	483	500	541	380	442	530	465	422	442	464	481	500	454	499	683	493	532	499	508	372	545	531	542	489	489	480	525	489	499	518	502	420	535	488	542	480	527	481	638	471
(3.75,4]	483	493	551	357	573	514	374	416	453	483	489	486	460	545	516	496	488	482	490	486	502	493	532	700	484	463	495	505	477	481	533	567	469	530	494	486	514	496	528	505	489	494	553	574	487	546	484	719	500
(4,4.25]	631	547	491	454	582	533	543	470	443	542	506	468	455	452	538	475	471	558	466	471	469	500	524	699	555	543	529	554	472	636	571	495	518	559	515	510	524	479	541	538	489	511	530	517	531	537	544	697	490
(4.25,4.5]	539	535	558	410	558	526	621	492	479	440	551	564	470	492	557	539	544	512	507	502	537	506	569	732	504	479	558	537	464	519	568	552	582	548	526	510	481	548	536	516	586	499	465	528	575	581	543	674	472
(4.5,4.75]	439	519	512	493	579	563	561	517	498	506	593	512	521	435	499	528	518	539	526	512	545	532	541	772	544	530	433	560	463	582	553	521	559	563	504	541	550	477	564	587	520	464	524	517	560	570	514	728	495
(4.75,5]	634	569	482	445	545	513	562	494	531	525	551	557	565	416	580	553	523	526	522	535	498	552	549	771	535	535	564	595	550	587	545	582	513	560	553	562	548	533	509	547	510	437	544	515	607	526	562	777	447
(5,5.25]	489	561	533	494	517	561	562	525	540	513	539	511	538	463	582	496	522	510	519	547	529	529	600	762	562	520	437	559	466	563	552	542	595	599	542	527	525	541	549	479	539	474	526	544	528	556	551	810	427
(5.25,5.5]	479	588	433	442	552	544	488	532	486	482	551	557	485	409	568	546	504	528	529	514	518	557	519	815	511	528	444	512	516	533	565	541	517	544	511	556	547	565	569	465	513	443	520	492	567	535	559	778	423
(5.5,5.75]	423	522	445	491	518	531	474	480	501	465	522	489	483	417	458	537	512	504	445	525	500	522	554	765	554	458	399	502	505	557	515	483	539	500	537	510	505	507	477	507	520	402	471	476	508	504	538	718	386
(5.75,6]	496	505	358	424	440	493	489	498	510	441	481	496	491	336	498	503	509	495	433	512	526	504	518	699	470	439	411	477	484	471	459	459	516	492	432	452	455	526	467	423	507	417	430	446	458	487	480	691	385
(6,6.25]	421	411	367	420	442	440	410	446	419	421	460	468	467	352	439	425	460	453	450	438	447	472	502	603	468	440	372	453	439	442	440	421	478	485	475	421	484	470	462	449	429	349	444	420	444	453	469	634	380
(6.25,6.5]	334	372	334	377	393	414	372	418	415	375	430	433	388	314	403	396	439	395	387	411	409	411	441	590	441	434	347	391	366	429	378	437	423	432	431	427	436	415	397	366	417	306	402	385	414	381	435	573	311
(6.5,6.75]	349	346	304	372	338	323	335	377	379	310	359	372	349	306	354	360	373	392	348	411	381	364	376	512	376	372	303	369	337	342	349	344	364	351	359	346	355	369	353	336	400	286	364	321	370	344	404	510	270
(6.75,7]	280	314	257	317	270	320	298	346	324	322	333	304	341	253	349	334	315	343	333	409	334	334	319	416	373	280	244	311	287	302	291	316	315	367	304	335	358	348	315	298	368	253	309	277	323	324	340	465	264
(7,7.25]	234	264	185	274	231	251	248	271	277	242	304	292	292	205	286	293	291	279	273	262	258	282	282	366	280	258	205	259	246	271	257	261	295	293	247	271	297	317	248	248	263	208	280	259	280	265	269	330	238
(7.25,7.5]	195	195	190	245	185	227	207	254	260	218	224	237	235	190	211	251	254	239	245	256	276	243	243	274	232	208	201	213	213	196	204	232	223	228	237	225	245	237	247	204	226	192	237	209	238	214	229	309	184
(7.5,7.75]	147	170	167	203	160	177	184	193	203	170	204	196	204	148	194	204	200	219	188	229	215	209	184	211	201	167	162	195	164	177	154	196	195	185	170	193	195	202	179	191	209	154	180	151	193	162	179	220	154
(7.75,8]	124	146	121	176	120	146	135	160	157	152	153	172	148	140	140	132	169	136	167	183	167	168	171	181	147	144	113	130	122	139	125	154	137	156	150	136	158	153	137	135	183	129	179	144	159	140	151	161	156
(8,8.25]	111	115	105	142	113	93	133	147	151	118	128	145	117	101	92	120	159	127	115	147	150	150	143	132	124	112	125	111	112	112	120	118	117	123	126	131	119	127	104	123	117	88	131	135	133	147	128	143	110
(8.25,8.5]	86	104	80	108	71	115	95	119	117	99	99	100	118	111	94	96	109	102	114	87	100	104	89	93	105	91	83	103	92	72	90	86	87	97	113	105	99	113	95	95	118	85	94	94	92	106	109	105	122
(8.5,8.75]	73	68	58	89	71	71	65	81	92	78	62	83	70	70	83	79	92	82	90	104	98	73	78	74	86	62	78	80	67	49	57	74	76	63	90	69	95	86	85	81	88	56	77	70	76	67	72	69	89
(8.75,9]	64	42	53	73	51	63	56	67	70	68	70	72	64	60	44	59	61	74	73	77	61	62	58	45	67	62	61	63	46	56	32	61	56	56	64	74	65	54	54	64	78	52	73	68	74	54	70	54	56
(9,9.25]	49	40	57	39	38	40	40	48	70	42	48	43	61	40	46	39	60	43	62	61	42	44	39	32	41	43	41	42	42	37	28	35	38	44	44	52	37	48	31	49	47	37	48	47	40	55	44	35	64
(9.25,9.5]	36	33	30	31	26	34	27	34	39	34	37	36	37	45	37	34	36	28	39	38	41	24	31	27	32	20	42	24	38	30	29	41	25	35	34	32	40	41	40	34	36	31	39	35	38	36	30	24	46
(9.5,9.75]	18	24	27	27	24	27	24	25	29	25	27	29	21	30	27	28	25	28	28	25	28	23	26	15	20	22	27	21	18	25	12	28	21	19	20	30	26	32	31	26	28	30	32	23	19	26	22	17	41
(9.75,10]	15	19	21	15	18	20	24	16	19	31	24	11	20	19	20	23	12	23	16	22	25	24	21	11	18	18	14	15	20	13	22	15	24	20	22	16	21	15	20	22	18	23	18	16	16	20	25	15	28
(10,10.25]	9	15	14	17	17	24	11	16	14	13	14	7	12	28	15	16	19	25	18	16	8	12	12	9	19	13	17	9	13	15	8	13	14	22	23	14	11	9	10	18	10	13	10	17	10	15	16	8	19
(10.25,10.5]	13	16	12	10	6	14	10	14	12	16	14	16	14	22	12	14	11	10	8	14	10	7	11	12	11	15	14	17	8	10	14	5	7	15	8	15	12	12	12	10	12	14	6	16	15	13	10	9	13
(10.5,10.75]	12	7	8	17	9	12	9	12	14	12	10	11	10	9	7	10	12	12	11	10	8	9	6	4	8	7	8	12	7	5	11	6	12	9	15	14	7	15	8	9	8	6	12	10	9	11	10	4	19
(10.75,11]	11	5	8	5	8	9	7	8	11	14	7	11	5	11	7	10	10	7	15	8	11	4	9	3	19	6	8	5	8	4	8	13	9	11	6	9	10	9	10	14	11	8	14	12	10	8	17	6	12
(11,11.25]	4	4	6	3	6	7	7	8	9	5	10	4	3	10	8	5	5	9	5	7	4	10	9	2	5	2	7	6	2	8	5	9	5	6	6	7	7	6	4	7	8	7	6	9	9	4	5	4	14
(11.25,11.5]	1	6	8	5	5	6	5	3	8	6	7	8	10	4	7	7	5	4	5	6	4	6	5	8	6	7	6	4	6	3	3	4	2	3	7	4	2	4	4	3	7	3	6	2	4	8	9	5	7
(11.5,11.75]	6	4	5	4	6	4	5	3	1	2	4	2	7	4	7	5	3	7	5	5	7	4	3	5	4	6	4	3	6	7	4	8	7	2	4	2	3	2	4	4	10	2	5	7	6	7	2	2	7
(11.75,12]	2	3	1	1	5	3	3	5	1	3	3	9	2	3	4	5	2	2	3	4	1	3	2	4	7	4	3	2	6	6	4	2	5	4	0	3	8	8	2	4	2	3	3	3	3	4	2	5	7
(12,12.25]	1	2	4	4	4	2	3	0	3	4	2	4	2	3	4	1	3	1	2	3	3	2	4	0	5	2	3	5	8	3	3	3	5	3	4	3	3	3	3	6	3	3	5	3	10	3	3	0	1
(12.25,12.5]	2	1	1	3	6	3	1	3	3	3	2	2	2	5	2	2	4	1	2	4	3	1	5	1	0	4	2	2	4	1	5	4	2	3	2	3	3	1	4	4	4	2	1	5	2	2	5	3	4
(12.5,12.75]	5	2	2	3	2	3	2	3	3	1	3	0	3	1	1	5	3	4	4	7	3	4	0	0	0	2	3	2	3	0	2	3	2	3	2	1	1	4	3	4	2	1	2	2	0	1	3	0	3
(12.75,13]	4	2	3	2	2	3	0	5	3	5	3	1	1	4	3	2	4	4	4	0	3	1	3	2	4	1	1	1	4	2	4	2	2	1	4	5	1	0	2	0	1	2	6	0	0	2	3	0	3
(13,13.25]	2	1	0	3	1	2	4	2	3	1	2	4	2	2	2	1	0	3	3	0	0	2	1	2	1	0	2	4	2	1	2	2	1	1	2	3	0	0	1	2	1	1	1	3	3	0	1	2	1
(13.25,13.5]	2	6	4	2	0	0	2	1	0	1	2	2	1	4	3	2	3	2	1	1	0	1	0	1	2	1	2	1	1	2	0	0	3	1	1	2	3	5	0	2	1	0	1	2	3	1	1	0	3
(13.5,13.75]	2	0	1	1	1	1	1	1	1	2	1	0	5	1	1	0	2	0	2	1	2	1	2	0	0	0	2	1	1	3	1	0	1	1	0	2	2	0	1	0	0	2	0	2	1	1	0	2	2
(13.75,14]	0	2	1	1	2	3	2	1	1	1	1	2	0	1	1	2	1	0	0	1	2	1	1	0	0	2	0	2	1	1	0	0	0	1	1	0	0	0	3	1	1	0	2	1	1	0	0	0	2
(14,14.25]	2	0	1	1	0	1	0	1	1	0	1	1	0	1	0	0	0	0	1	0	1	2	2	1	1	3	0	0	0	0	0	0	0	1	1	0	0	0	0	1	0	2	0	0	0	0	1	0	0
(14.25,14.5]	0	1	0	0	0	1	0	0	0	1	0	0	0	1	0	0	0	2	0	1	0	0	0	1	1	2	1	0	0	1	0	0	1	0	0	1	0	0	0	0	0	2	1	1	0	0	1	1	0
(14.5,14.75]	0	1	0	0	0	1	0	0	0	1	0	0	1	1	1	1	0	0	0	0	0	1	0	1	0	0	0	0	1	0	0	1	1	0	0	0	0	1	0	0	1	3	0	0	0	0	0	1	0
(14.75,15]	0	0	0	0	0	0	1	0	1	0	0	0	0	1	0	0	1	1	1	0	0	0	0	0	0	0	0	0	0	0	1	1	0	0	1	0	1	0	1	1	0	0	0	1	2	1	0	0	0
(15,15.25]	0	0	1	0	1	0	1	0	0	1	1	1	0	0	0	0	0	0	0	0	0	0	0	0	0	0	2	1	1	0	0	0	0	1	0	1	0	0	0	0	0	0	1	1	0	0	0	0	0
(15.25,15.5]	1	0	1	0	0	0	0	1	0	0	0	0	1	0	0	0	0	0	0	0	1	1	0	0	1	0	0	0	0	1	0	0	0	0	0	0	0	0	0	0	1	0	0	0	0	0	0	0	0
(15.5,15.75]	0	0	0	0	1	0	1	0	0	0	0	0	0	0	1	1	0	0	0	0	0	0	1	0	0	0	0	0	0	0	1	0	0	1	1	0	0	1	0	1	0	0	0	0	0	0	1	0	0
(15.75,16]	0	0	0	0	0	0	0	0	0	0	0	0	0	0	0	0	0	0	0	0	0	0	0	0	0	0	0	0	0	0	0	0	1	0	0	0	1	0	0	0	0	0	0	0	0	0	0	0	0
(16,16.25]	1	1	1	1	1	0	0	0	0	0	0	0	0	0	0	0	0	0	0	0	0	0	0	0	0	1	1	1	1	0	0	0	0	0	0	0	0	0	1	0	0	0	0	0	0	0	0	0	0
(16.25,16.5]	0	0	0	0	0	0	0	0	0	0	0	0	0	0	0	0	0	0	0	0	0	0	0	0	0	0	0	0	0	1	0	1	0	0	0	0	0	0	0	0	0	0	0	0	0	0	0	0	0
(16.5,16.75]	0	0	0	0	0	0	0	0	0	0	0	0	0	0	0	0	0	0	0	0	0	0	0	0	0	0	0	0	0	0	1	0	0	0	0	0	0	0	0	0	0	1	0	0	0	1	0	0	0
(16.75,17]	0	0	0	0	0	0	0	0	0	0	0	0	0	0	0	0	0	0	0	0	0	0	0	0	0	0	0	0	0	0	0	0	0	0	0	0	0	0	0	0	0	0	0	0	0	0	0	0	0
(17,17.25]	0	0	0	0	0	0	0	0	0	0	0	0	0	0	0	0	0	0	0	0	0	0	0	0	0	0	0	0	0	0	0	0	0	0	0	0	0	0	0	0	0	0	0	0	0	0	0	0	0
(17.25,17.5]	0	0	0	0	0	0	0	0	0	0	0	0	0	0	0	0	0	0	0	0	0	0	0	0	0	0	0	0	0	0	0	0	0	0	0	0	0	0	0	0	0	0	0	0	0	0	0	0	0
(17.5,17.75]	0	0	0	0	0	0	0	0	0	0	0	0	0	0	0	0	0	0	0	0	0	0	0	0	0	0	0	0	0	0	0	0	0	0	0	0	0	0	0	0	0	0	0	0	0	0	0	0	0
(17.75,18]	0	0	0	0	0	0	0	0	0	0	0	0	0	0	0	0	0	0	0	0	0	0	0	0	0	0	0	0	0	0	0	0	0	0	0	0	0	0	0	0	0	0	0	0	0	0	0	0	0
(18,18.25]	0	0	0	0	0	0	0	0	0	0	0	0	0	0	0	0	0	0	0	0	0	0	0	0	0	0	0	0	0	0	0	0	0	0	0	0	0	0	0	0	0	0	0	0	0	0	0	0	0
(18.25,18.5]	0	0	0	0	0	0	0	0	0	0	0	0	0	0	0	0	0	0	0	0	0	0	0	0	0	0	0	0	0	0	0	0	0	0	0	0	0	0	0	0	0	0	0	0	0	0	0	0	0
[truncated: 214 more columns]
