# Supplementary material for: Integration of Bulk RNA-seq Pipeline Metrics for Assessing Low-Quality Samples
Source: Research Square preprint supplement (doi:10.21203/rs.3.rs-6976695/v1), 2025-07-03
Supplement: Supplementary file 4 [file fb37ab4fdca2446d962bd581.xlsx]

## Sheet: Sheet1
Cutoff	# Sequencing Depth	% Post-Trim Reads	% Uniquely Aligned Reads	% Reads Mapped to Exons	% rRNA Reads	% Overrep Sequences (Post-Trim)	% Adapter Content (Post-Trim)	# Detected Genes	Gene Body Coverage
Warn	6000000	96	87	47	0.35	0.3	0.3	16600	0.25
Fail	5500000	94	86	51	0.4	0.4	0.4	16300	0.3
